# Supplementary material for: Amelioration of Pulmonary Fibrosis by Matrix Metalloproteinase-2 Overexpression
Source: MDPI journal article supplement (doi:10.3390/ijms24076695), 2023-04-03
Supplement: s1 [file s1]

# **Supplemental Information**

## **Amelioration of Pulmonary Fibrosis by Matrix Metalloproteinase-2 Overexpression**

Ryo Inoue, Taro Yasuma, Valeria Fridman D'Alessandro, Masaaki Toda, Toshiyuki Ito, Atsushi Tomaru, Corina N. D' Alessandro-Gabazza, Tatsuki Tsuruga, Tomohito Okano, Atsuro Takeshita, Kota Nishihama, Hajime Fujimoto, Tetsu Kobayashi, Esteban C. Gabazza.

Supplementary Table S1. Matrix metalloproteinases in pulmonary fibrosis

| MMP                                       | s | Reference number |
|-------------------------------------------|---|------------------|
| MMP-1                                     |   |                  |
| Profibrotic                               |   | 31               |
| Antifibrotic                              |   | 34               |
| MMP-2                                     |   |                  |
| Profibrotic                               |   | 50               |
| Antifibrotic                              |   | current study    |
| No effect on fibrosis                     |   | 42               |
| MMP-3                                     |   |                  |
| Profibrotic                               |   | 28               |
| MMP-7                                     |   |                  |
| Profibrotic                               |   | 40               |
| Antifibrotic                              |   | 35               |
| MMP-8                                     |   |                  |
| Profibrotic                               |   | 23, 24           |
| MMP-9                                     |   |                  |
| Profibrotic                               |   | 44, 48, 49       |
| Antifibrotic                              |   | 21, 43           |
| No effect on collagen deposition          |   | 41, 42           |
| MMP-10                                    |   |                  |
| Antifibrotic                              |   | 27               |
| MMP-11                                    |   |                  |
| Profibrotic                               |   | 22               |
| MMP-12                                    |   |                  |
| Profibrotic                               |   | 46               |
| Antifibrotic                              |   | 45               |
| No effect on fibrosis                     |   | 47               |
| MMP-13                                    |   |                  |
| Profibrotic                               |   | 32               |
| Antifibrotic                              |   | 30, 36, 37       |
| MMP-14                                    |   |                  |
| Profibrotic                               |   | 38               |
| Antifibrotic                              |   | 39               |
| MMP-15, -16, -17                          |   |                  |
| Unknown                                   |   |                  |
| MMP-19                                    |   |                  |
| Antifibrotic                              |   | 26, 29           |
| MMP-20, -21, -22, -23, -24, -25, -26, -27 |   |                  |
| Unknown                                   |   |                  |
| MMP-28                                    |   |                  |
| Profibrotic                               |   | 25               |

MMP, matrix metalloproteinase

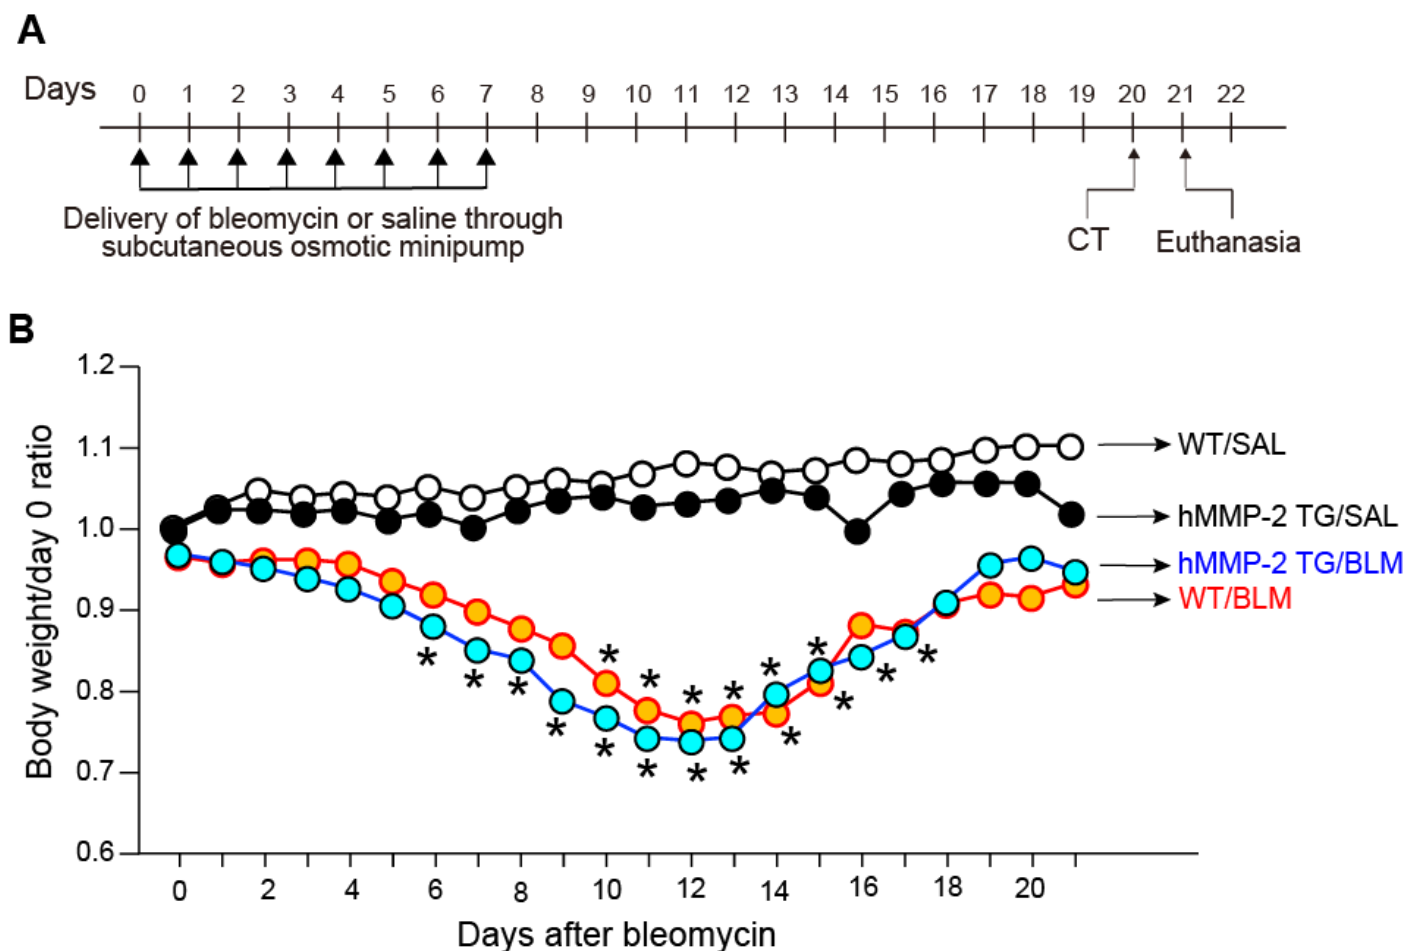

**Supplementary Figure S1. No difference in body weight between WT and hMMP-2 TG mice with lung fibrosis.** Mice received bleomycin or saline through osmotic minipumps for seven days. Lung fibrosis was evaluated on day 21 after the first day of bleomycin infusion (A). The body weight of the mice was measured daily and expressed as the ratio of body weight and body weight on day 0 (B). The number of mice: n=8 in WT/SAL, n=9 in hMMP-2 TG/SAL, n=16 in WT/BLM, and n=11 in hMMP-2 TG/BLM. All mice were female. Data are expressed as the mean. Statistical analysis by ANOVA with repeated measures and Newman-Keuls test. \* $p < 0.05$  vs. day 0.

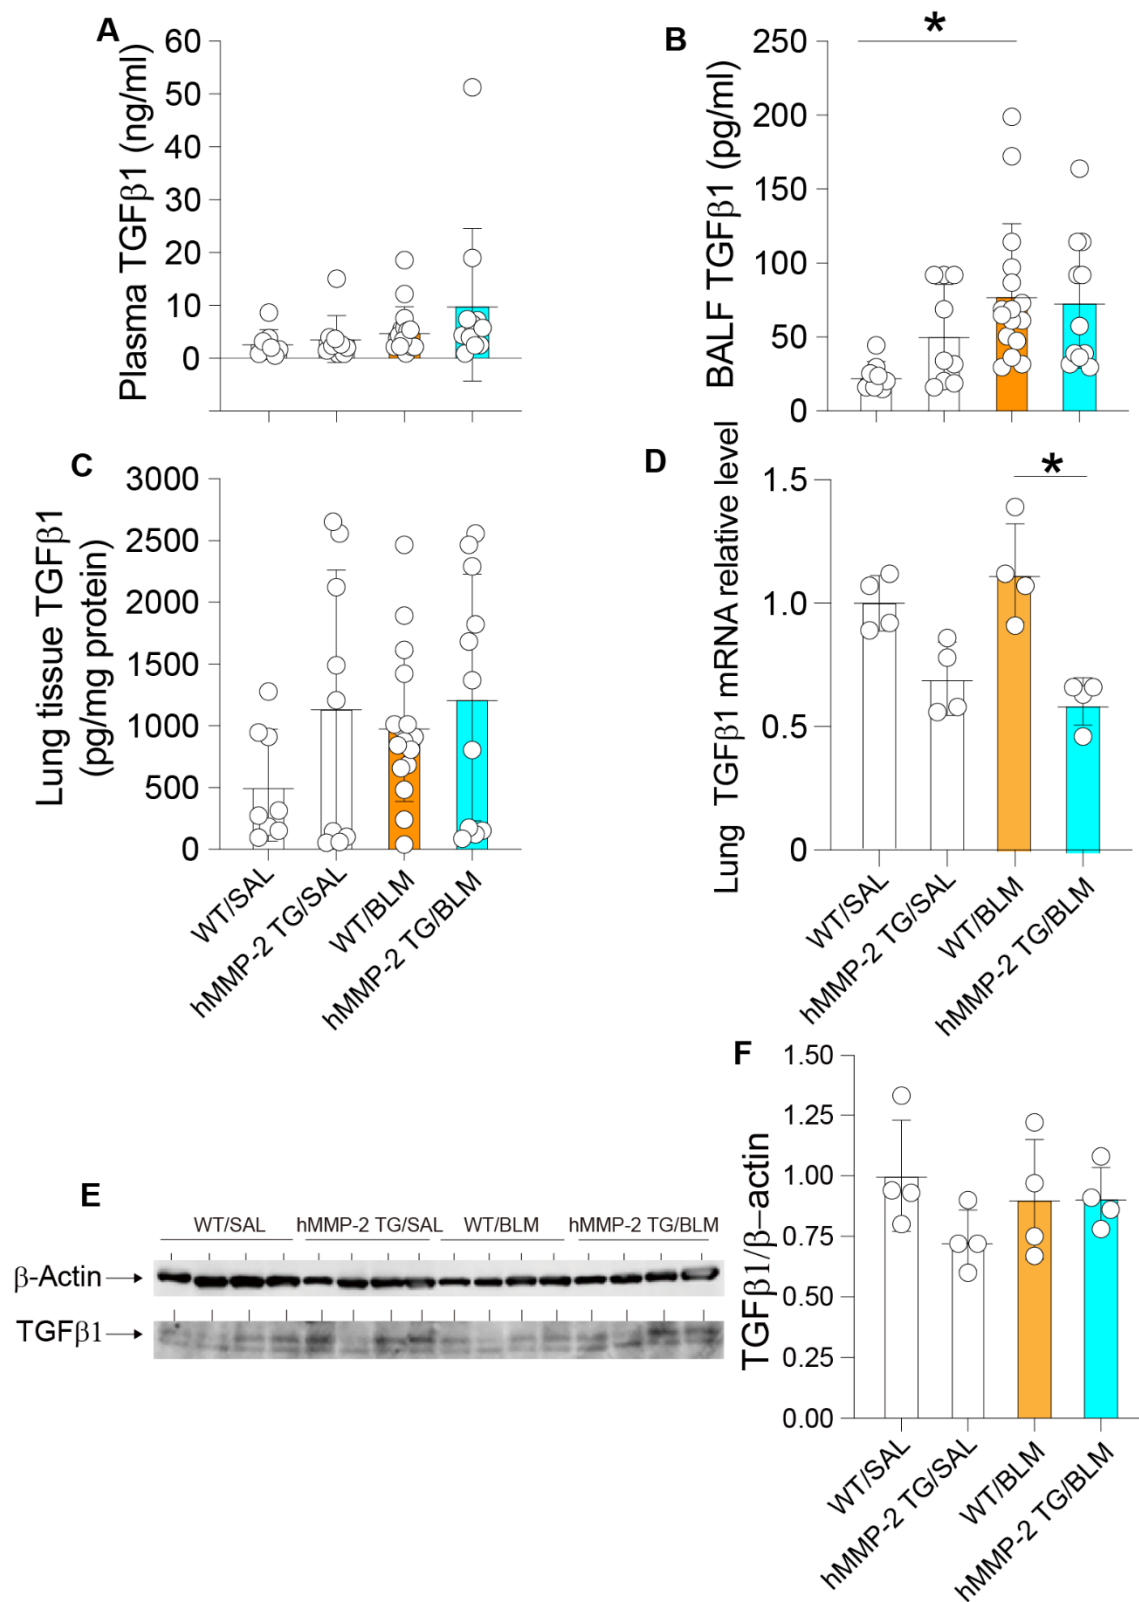

**Supplementary Figure S2. No significant change in the levels of transforming growth factor-β1 level.** A, B, C, the levels of transforming growth factor-β1 were measured by commercially available enzyme immunoassay kits following the manufacturer's instructions. The number of mice: n=8 in WT/SAL, n=9 in hMMP-2 TG/SAL, n=16 in WT/BLM, and n=11 in hMMP-2 TG/BLM. D, PCR was performed as described under materials and methods. n=4 in each group. E, F, Western blotting was performed using a commercially available antibody. n=4 in each group. Data are the mean ± S.D. Statistical analysis by ANOVA with Newman-Keuls test. \*p<0.05. WT, wild-type; hMMP-2, human matrix metalloproteinase-2; SAL, saline; BLM, bleomycin.

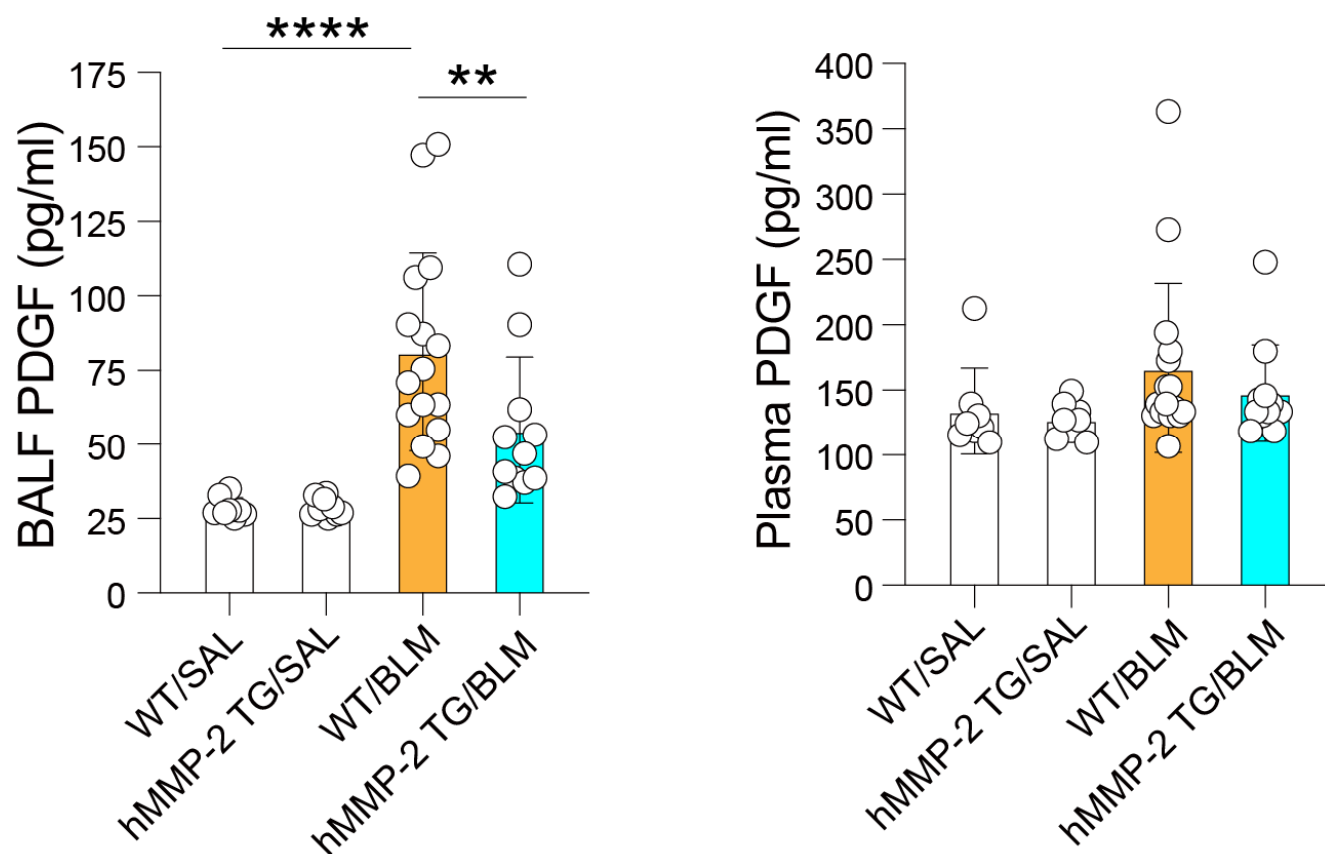

**Supplementary Figure S3. Reduced platelet-derived growth factor in hMMP-2 TG mice.** The platelet-derived growth factor (PDGF) level was measured as described under materials and methods. The number of mice: n=8 in WT/SAL, n=9 in hMMP-2 TG/SAL, n=16 in WT/BLM, and n=11 in hMMP-2 TG/BLM. Data are the mean  $\pm$  S.D. Statistical analysis by ANOVA with Newman-Keuls test. \*\*\*\*p<0.0001; \*\*p<0.01. WT, wild-type; hMMP-2, human matrix metalloproteinase-2; SAL, saline; BLM, bleomycin.

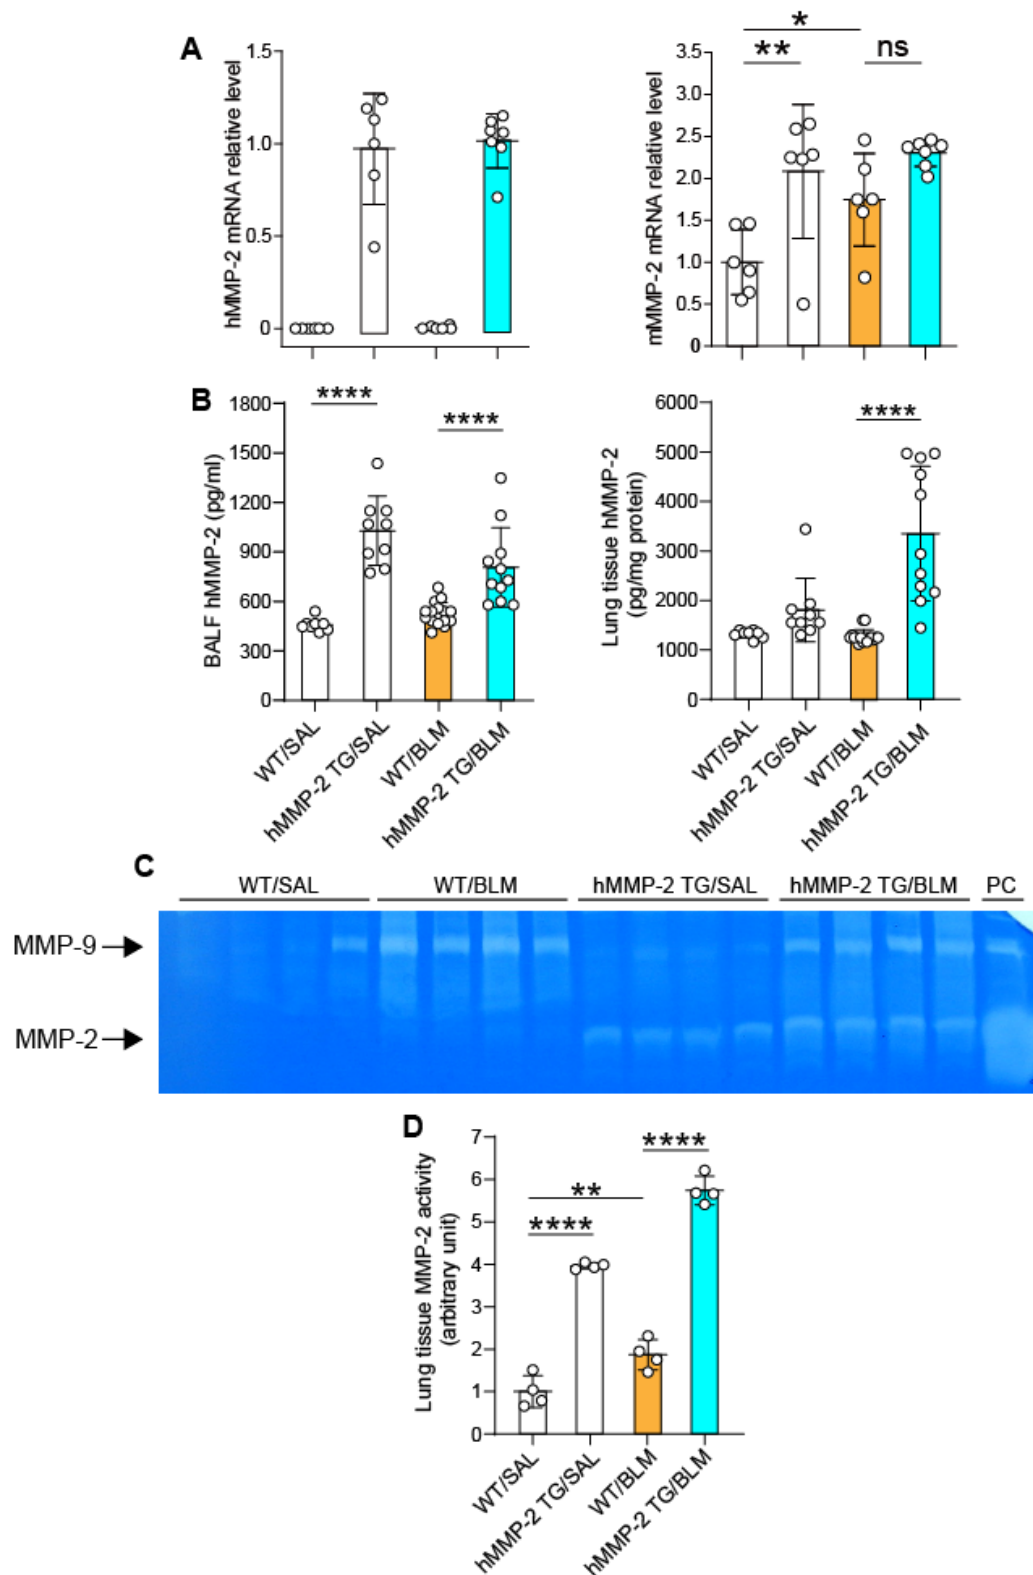

**Supplementary Figure S4. Increased level and activity of MMP-2 in hMMP-2 TG mice.** The levels of human MMP-2 were measured by polymerase chain reaction (A) and by commercially available enzyme immunoassay (B) and zymography (C, D) as described under materials and methods. The number of mice in A: n=6 in WT/SAL, hMMP-2 TG/SAL, WT/BLM, and n=7 in hMMP-2 TG/BLM. The number of mice in B: n=8 in WT/SAL, n=9 in hMMP-2 TG/SAL, n=9 in WT/BLM, and n=11 in hMMP-2 TG/BLM. The number of mice in C: n=4 in all groups. Data are the mean  $\pm$  S.D. Statistical analysis by ANOVA with Newman-Keuls test. \* $p < 0.05$ ; \*\* $p < 0.01$ ; \*\*\*\* $p < 0.0001$ . WT, wild-type; hMMP-2, human matrix metalloproteinase-2; SAL, saline; BLM, bleomycin.

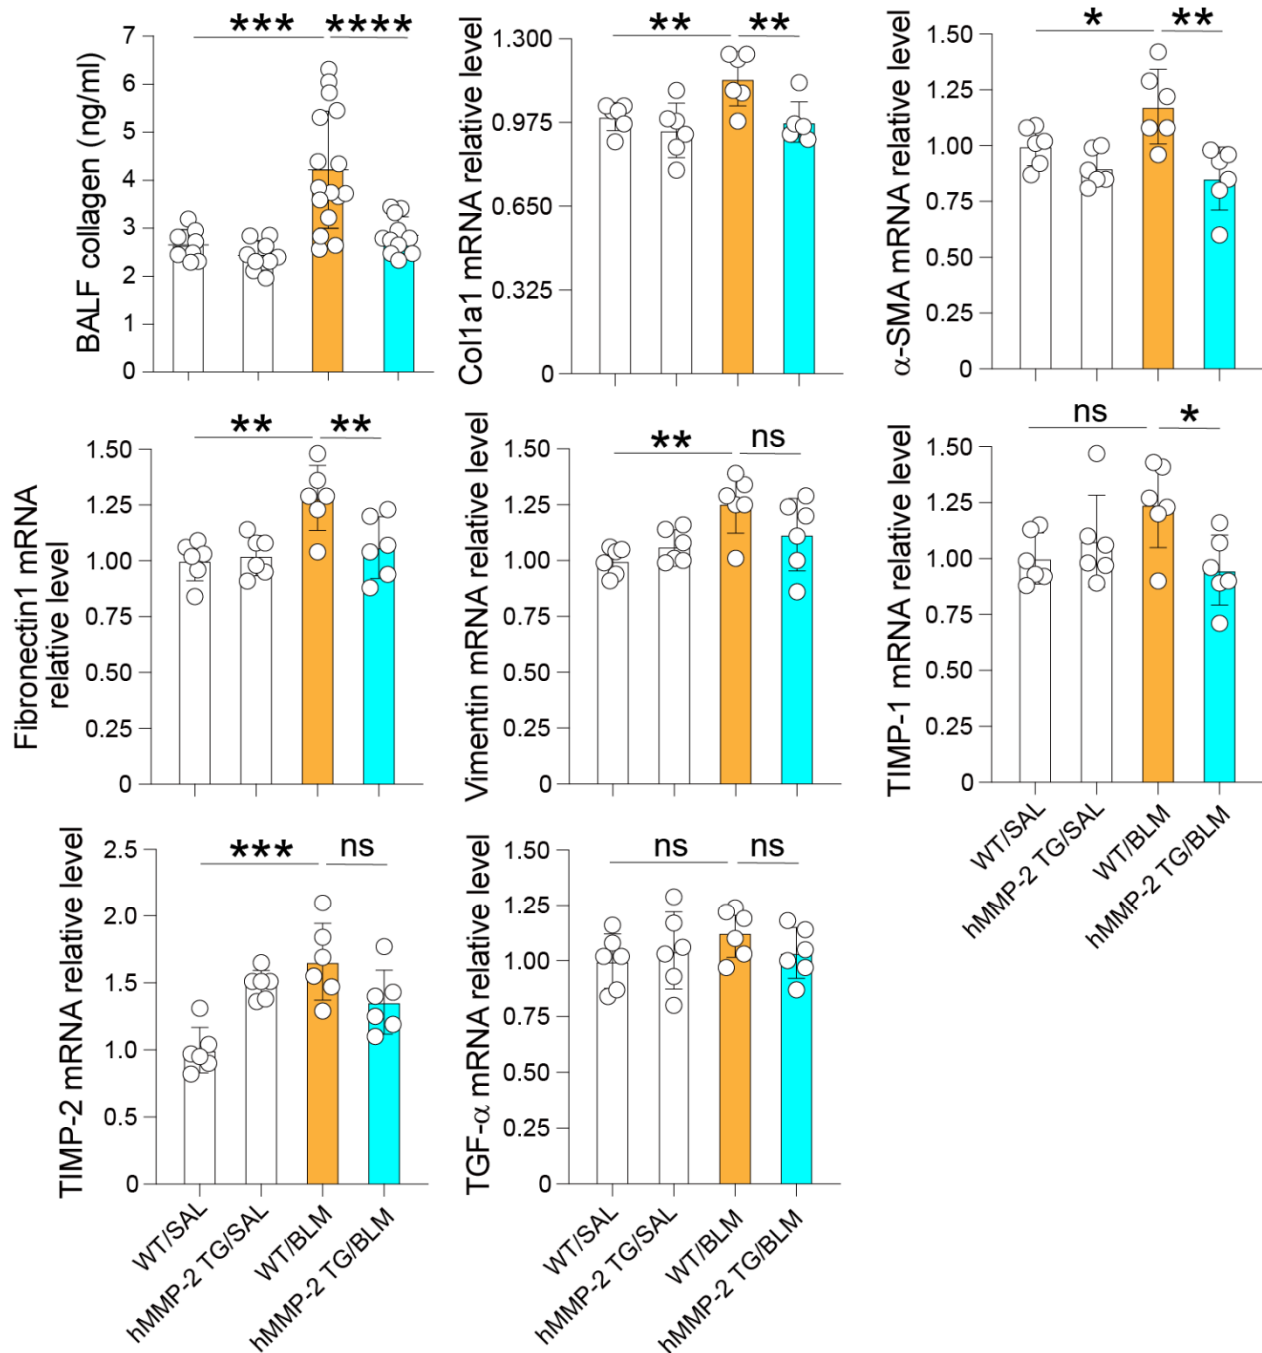

**Supplementary Figure S5. The bronchoalveolar lavage fluid level of collagen, the mRNA expression of matrix components, inhibitors of metalloproteinases, and transforming growth factor- $\alpha$ .** The bronchoalveolar lavage fluid (BALF) level of collagen was measured by immunoassay as described under materials and methods. The mRNA expression of matrix components and inhibitors of metalloproteinases was evaluated by RT-PCR as described under materials and methods. The number of mice was  $n=4$  in all groups. Data are the mean  $\pm$  S.D. Statistical analysis by ANOVA with Newman-Keuls test. \* $p<0.05$ ; \*\* $p<0.01$ ; \*\*\* $p<0.001$ ; \*\*\*\* $p<0.0001$ . WT, wild-type; hMMP-2, human matrix metalloproteinase-2; SAL, saline; BLM, bleomycin.

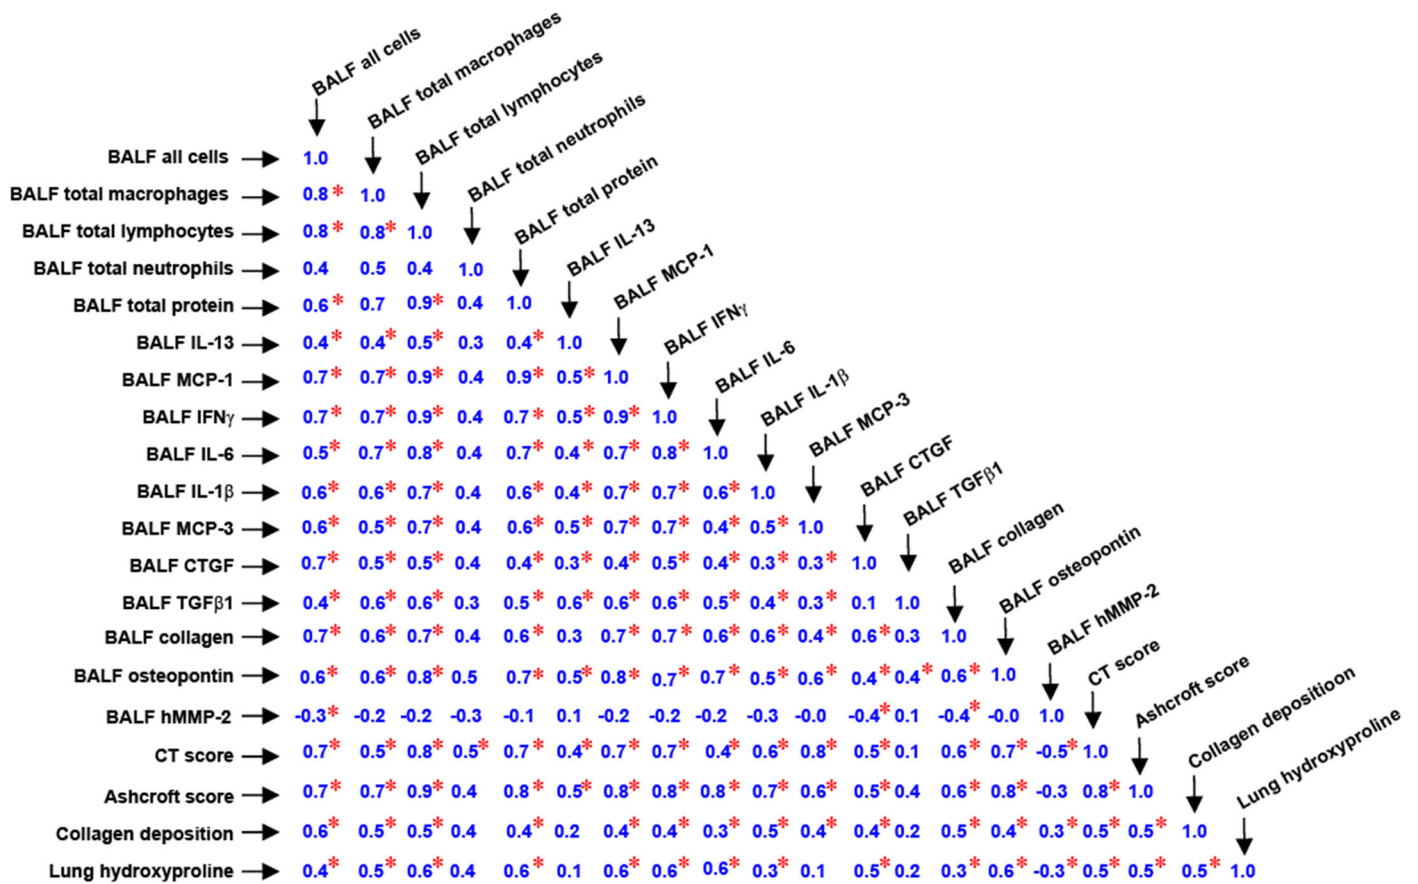

**Supplementary Figure S6. Correlations between several parameters.** The strength of the correlation between parameters was calculated using the Spearman correlation. BALF, bronchoalveolar lavage fluid; IL, interleukin; MCP-1, monocyte chemoattractant protein-1; MCP-3, monocyte chemoattractant protein-3; IFN $\gamma$ , interferon- $\gamma$ ; CTGF, connective tissue growth factor; TGF $\beta$ 1, transforming growth factor- $\beta$ 1; hMMP-2, human matrix metalloproteinase-2. \*p<0.05.



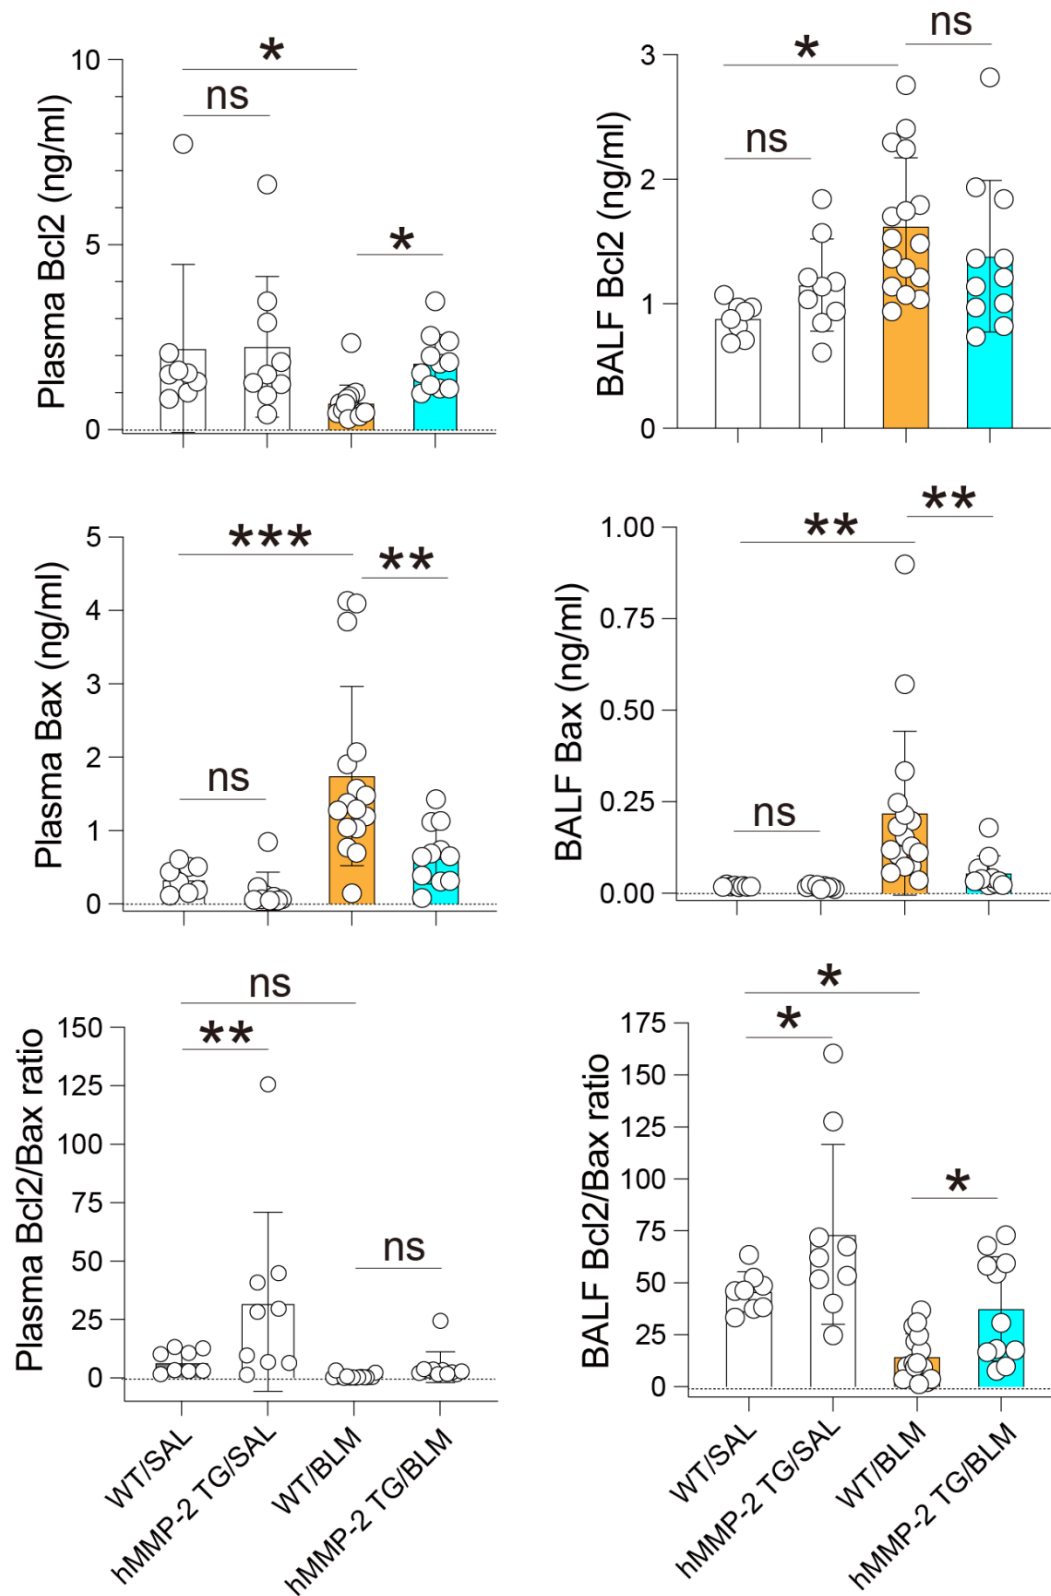

**Supplementary Figure S7. Increased antiapoptotic protein level and decreased proapoptotic protein level in hMMP-2 TG mice.** The plasma and bronchoalveolar lavage fluid (BALF) levels of Bcl2 and Bax were measured by commercially available enzyme immunoassay as described under materials and methods. The number of mice: n=8 in WT/SAL, n=9 in hMMP-2 TG/SAL, n=16 in WT/BLM, and n=11 in hMMP-2 TG/BLM. Data are the mean ± S.D. Statistical analysis by ANOVA with Newman-Keuls test. \*p<0.05; \*\*p<0.01; \*\*\*p<0.001. WT, wild-type; hMMP-2, human matrix metalloproteinase-2; SAL, saline; BLM, bleomycin.

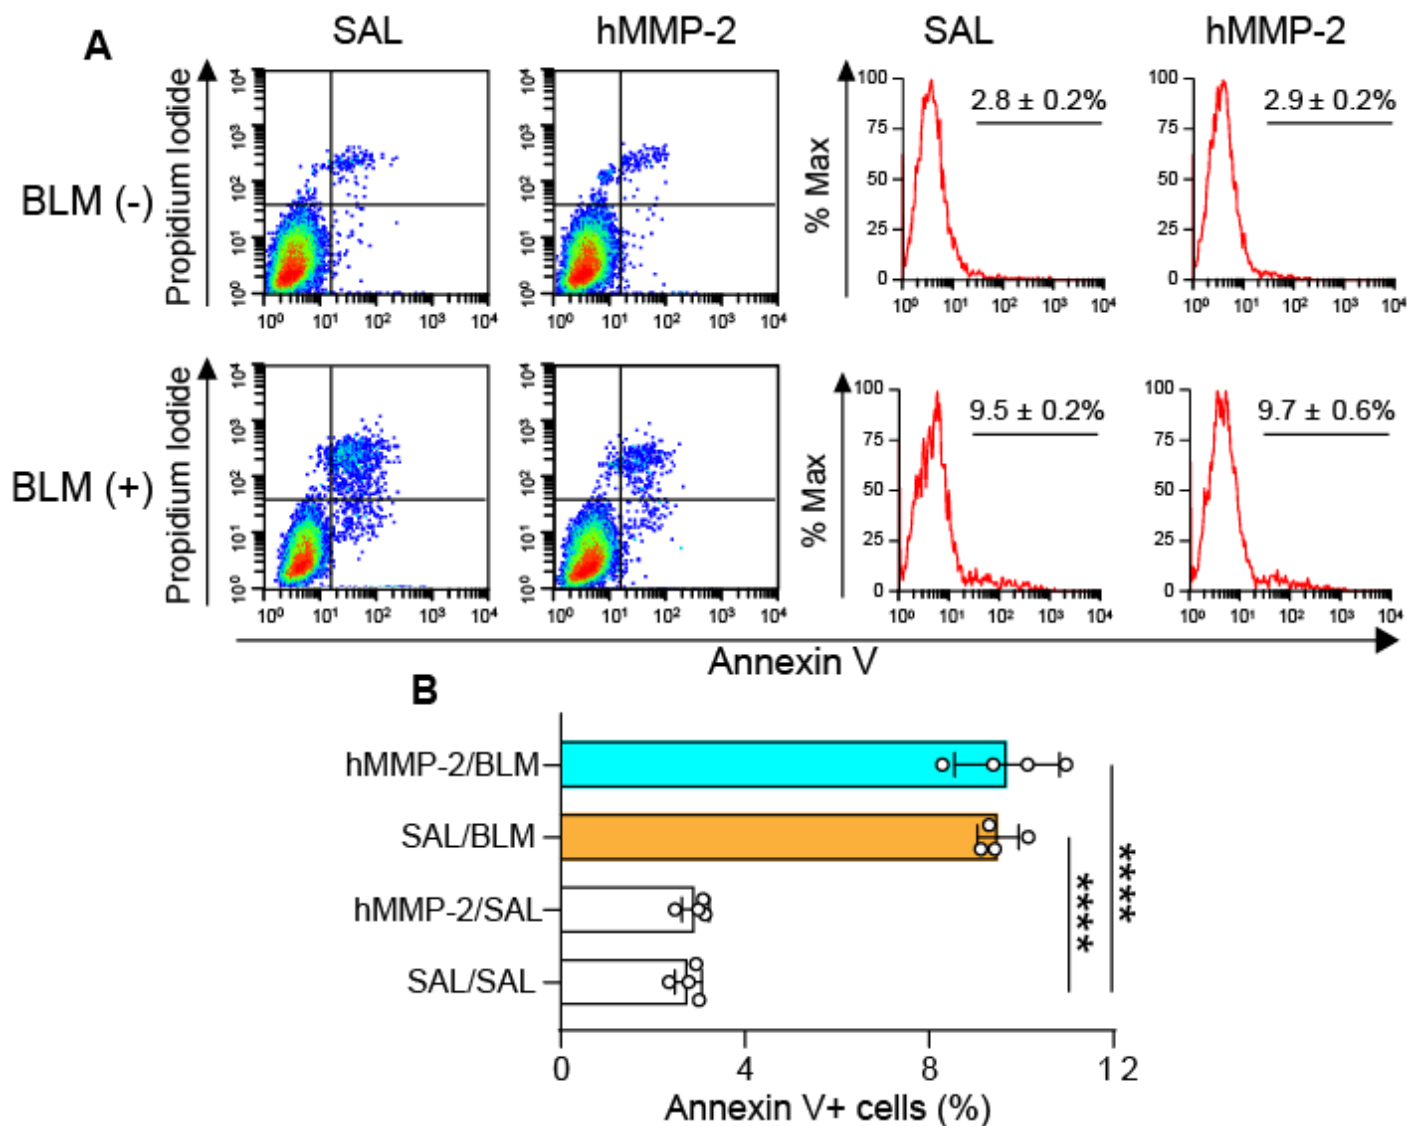

**Supplementary Figure S8. Active hMMP2 does not inhibit apoptosis of lung fibroblasts.** Murine lung fibroblasts were cultured and pretreated with active hMMP-2 (0.5  $\mu\text{g/ml}$ ) before stimulating with BLM (50 mU/ml) to evaluate apoptosis by flow cytometry.  $n=4$  in each treatment group (A, B). Data are the mean  $\pm$  S.D. Statistical analysis by ANOVA with Newman-Keuls test. \*\*\*\* $p<0.0001$ ; hMMP-2, human matrix metalloproteinase-2; SAL, saline; BLM, bleomycin.

**Supplementary Table S2. Primers for RT-PCR**

|                   | Sequence (5' -> 3')      | Tm   | Reference    | Location  | Product size |
|-------------------|--------------------------|------|--------------|-----------|--------------|
| mBIRC1a (NAIP1)   |                          |      |              |           |              |
| Sense             | TGCCCAGTATATCCAAGGCTAT   | 60.2 | NM_008670    | 708-729   | 116 bp       |
| Antisense         | AGACGCTGTCGTTGCAGTAAG    | 62.6 |              | 823-803   |              |
| mBIRC1b (NAIP2)   |                          |      |              |           |              |
| Sense             | AGCTTGGTGTCTGTTCTCTGT    | 61.0 | NM_001126182 | 1204-1224 | 180 bp       |
| Antisense         | GCGGAAAGTAGCTTTGGTGTAG   | 61.2 |              | 1383-1362 |              |
| mBIRC2 (c-IAP1)   |                          |      |              |           |              |
| Sense             | TGTGGCCTGATGTTGGATAAC    | 60.0 | NM_007465    | 256-276   | 164 bp       |
| Antisense         | GGTGACGAATGTGCAAATCTACT  | 60.9 |              | 419-397   |              |
| mBIRC3 (c-IAP2)   |                          |      |              |           |              |
| Sense             | ACGCAGCAATCGTGCATTTTG    | 62.9 | NM_007464    | 1073-1093 | 181 bp       |
| Antisense         | CCTATAACGAGGTCCTGACGG    | 61.6 |              | 1253-1232 |              |
| mBIRC4 (XIAP)     |                          |      |              |           |              |
| Sense             | CGAGCTGGGTTTCTTTATACCG   | 60.7 | NM_009688    | 145-166   | 126 bp       |
| Antisense         | GCAATTT GGGGATATTCTCCTGT | 60.4 |              | 270-248   |              |
| mBIRC5 (Survivin) |                          |      |              |           |              |
| Sense             | GAGGCTGGCTTCATCCACTG     | 62.6 | NM_009689    | 118-137   | 250 bp       |
| Antisense         | CTTTTGCTTGTTGTTGGTCTCC   | 60.7 |              | 367-345   |              |
| mBIRC6 (Apollon)  |                          |      |              |           |              |
| Sense             | ACAGATTGTCTTACCTCTTGCCC  | 61.9 | NM_007566    | 695-717   | 120 bp       |
| Antisense         | GCCACGAAGTGAAGGTCTCC     | 62.5 |              | 814-795   |              |
| mBIRC7 (ml-IAP)   |                          |      |              |           |              |
| Sense             | AGCCTCCTTCTACGACTGG      | 60.1 | NM_001163247 | 291-309   | 245 bp       |
| Antisense         | GCAAAGGGGTGTAGGTCTGG     | 62.2 |              | 535-516   |              |
| mTGF- $\alpha$    |                          |      |              |           |              |
| Sense             | CACTCTGGGTACGTGGGTG      | 61.7 | NM_031199    | 217-235   | 136 bp       |
| Antisense         | CACAGGTGATAATGAGGACAGC   | 60.4 |              | 352-331   |              |
| m $\alpha$ SMA    |                          |      |              |           |              |
| Sense             | CAGGATGCAGAAGGAGATCAC    | 63.7 | NM007392.2   | 1009-1029 | 364 bp       |
| Antisense         | TGTTGCTAGGCCAGGGCTAC     | 66.3 |              | 1372-1353 |              |
| mVimentin         |                          |      |              |           |              |
| Sense             | CGGCTGCGAGAGAAATTGC      | 61.8 | NM_011701    | 550-568   | 124 bp       |
| Antisense         | CCACTTCCGTTCAAGGTCAAG    | 61.3 |              | 673-652   |              |
| mMMP2             |                          |      |              |           |              |
| Sense             | CACCACCGAGGACTATGACC     | 61.4 | NM_008610    | 954-973   | 122 bp       |
| Antisense         | TGTTGCCCAGGAAAGTGAAG     | 62.2 |              | 1075-1056 |              |
| hMMP2             |                          |      |              |           |              |
| Sense             | TACTGGATCTACTCAGCCAGCAC  | 61.8 | NM_004530    | 1618-1640 | 184 bp       |
| Antisense         | CAGGATCCATTTTCTTCTTCACC  | 62.2 |              | 1801-1779 |              |
| mTIMP1            |                          |      |              |           |              |
| Sense             | TGTCCACAAGTCCCAGAACC     | 65.0 | NM_011593    | 402-421   | 110 bp       |
| Antisense         | TCAGATTATGCCAGGGAACC     | 63.7 |              | 511-492   |              |
| mTIMP2            |                          |      |              |           |              |
| Sense             | TGGACGTTGGAGGAAAGAAG     | 64.1 | NM_011594    | 305-324   | 97 bp        |
| Antisense         | TCTGGGTGATGCTAAGCGTG     | 65.1 |              | 401-382   |              |
| mFibronectin      |                          |      |              |           |              |
| Sense             | TTCAAGTGTGATCCCCATGAAG   | 60.0 | NM_010233    | 7126-7147 | 154 bp       |
| Antisense         | CAGGTCTACGGCAGTTGTCA     | 61.5 |              | 7279-7260 |              |
| mGAPDH            |                          |      |              |           |              |
| Sense             | TGGCCTTCCGTGTTTCCTAC     | 61.3 | NM_008084    | 686-704   | 178 bp       |
| Antisense         | GAGTTGCTGTTGAAGTCGCA     | 60.9 |              | 863-844   |              |
| mColla1           |                          |      |              |           |              |
| Sense             | TAAGGGTCCCCAATGGTGAGA    | 67.4 | NM007742     | 107-127   | 203 bp       |
| Antisense         | GGGTCCCTCGACTCCTACAT     | 64.2 |              | 309-290   |              |
| mBcl2             |                          |      |              |           |              |
| Sense             | AGCTGCACCTGACGCCCTT      | 69.6 | NM_177410    | 344-362   | 192 bp       |
| Antisense         | GTTCAGGTACTCAGTCATCCAC   | 60.1 |              | 535-516   |              |

|               |                        |      |              |           |  |       |
|---------------|------------------------|------|--------------|-----------|--|-------|
| mBax          |                        |      |              |           |  |       |
| Sense         | CGGCGAATTGGAGATGAACTG  | 68.7 | NM_007527    | 190-210   |  | 161bp |
| Antisense     | GCAAAGTAGAAGAGGGCAACC  | 63.8 |              | 350-330   |  |       |
| mBclxL        |                        |      |              |           |  |       |
| Sense         | AGGTTCTTAAGCTTCGCAATTC | 64.4 | NM_001289739 | 128-149   |  | 248bp |
| Antisense     | TGTTTAGCGATTCTCTTCCAGG | 64.2 |              | 375-354   |  |       |
| mMMP-9        |                        |      |              |           |  |       |
| Sense         | CCAGTATCTGTATGGTCGTG   | 64.2 | NM_013599    | 1336-1355 |  | 106bp |
| Antisense     | AGGTGCAGTGGGACACATAG   | 62.6 |              | 1441-1422 |  |       |
| mTNF $\alpha$ |                        |      |              |           |  |       |
| Sense         | ACGTGGAAGTGGCAGAAGAG   | 60.4 | NM_013693    | 193-212   |  | 284bp |
| Antisense     | CTCCTCCACTTGGTGGTTTG   | 60.5 |              | 476-457   |  |       |
| mIL-6         |                        |      |              |           |  |       |
| Sense         | CTGGTCTTCTGGAGTACCATAG | 59.3 | NM_031168    | 422-443   |  | 374bp |
| Antisense     | AAGTCAGATACCTGACAACAGG | 59.7 |              | 795-774   |  |       |

---

BIRC1a,1b, 2, 3, 4, 5, 6, or 7: baculoviral iap repeat-containing 1a, 1b, 2, 3, 4, 5, 6, or 7. NAIP1, or 2: neuronal apoptosis inhibitory protein1, or 2. c-IAP1, or 2: cellular inhibitor of apoptosis protein 1, or 2. x-IAP: x-linked inhibitor of apoptosis protein. ml-IAP: melanoma inhibitor of apoptosis. TGF- $\beta$ 1: transforming growth factor- $\beta$ 1. GAPDH: glyceraldehyde 3-phosphate dehydrogenase. Bcl2: B-cell lymphoma 2. Bax: Bcl-2-associated X protein. BclxL: B-cell lymphoma-extra large. m, mouse; TIMP, tissue inhibitor of metalloproteinase; TGF- $\alpha$ , transforming growth factor- $\alpha$ ;  $\alpha$ SMA,  $\alpha$ -smooth muscle actin; mTNF $\alpha$ , tumor necrosis factor $\alpha$ .
